# Supplementary material
Source: Springer Nature journal article supplement (https://www.springermedizin.de/resource/supplementary/12879_2008_767_MOESM3_ESM.pdf/9449752)

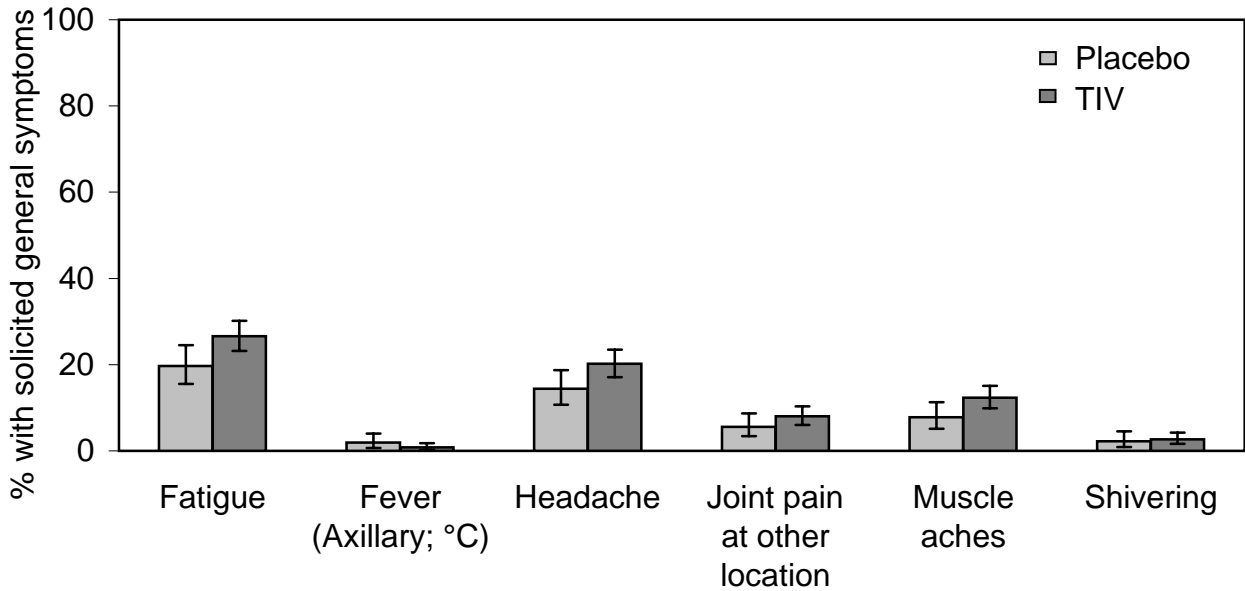

Supplement: MOESM3 [file 9449752]
